# Supplementary material for: LncRNA SNHG7 promotes cardiac remodeling by upregulating ROCK1 via sponging miR-34-5p
Source: publisher site journal article supplement (doi:10.18632/aging.103269), 2020-06-06
Supplement: Supplementary file [file aging-v12i11-103269-supplementary-material-SD1.pdf]

## SUPPLEMENTARY FIGURE

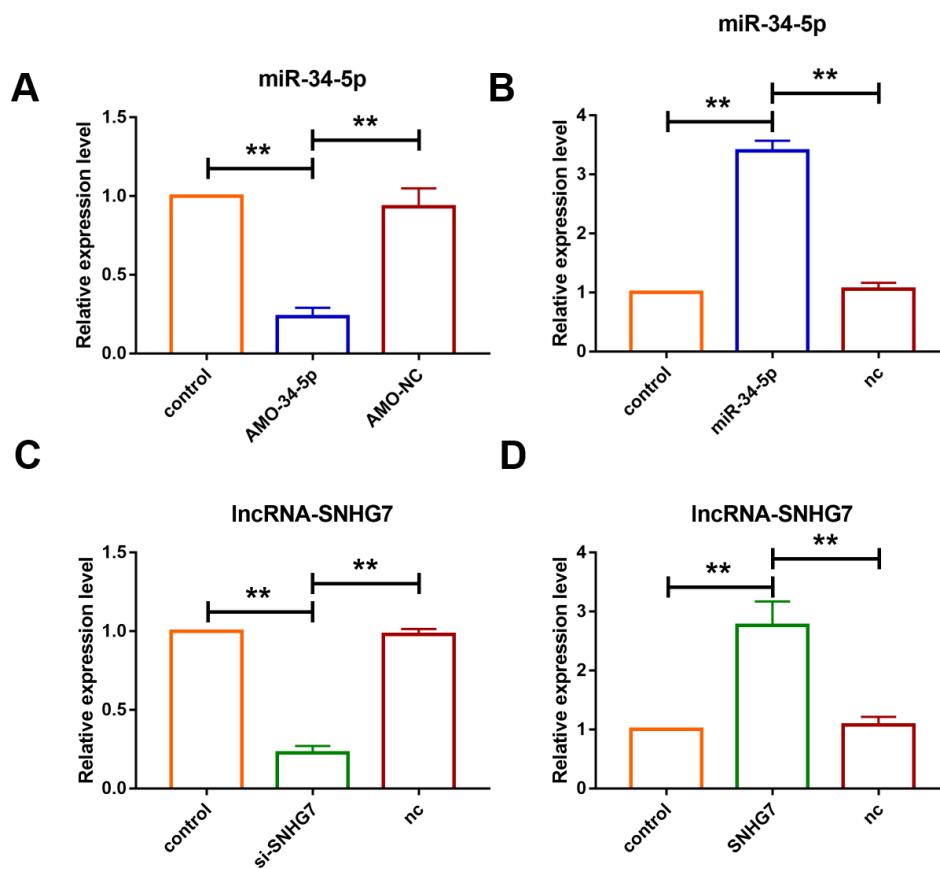

**Supplementary Figure 1. Determination of efficiencies of siRNA and expression plasmid, mimics and inhibitor.** (A–D) qRT-PCR analysis showing that overexpression and inhibition of miR-34-5p and lncRNA SNHG7. GAPDH mRNA served as an internal control. Data was presented as mean  $\pm$  SEM; one-way ANOVA was used for the statistical analysis.  $n=5$  independent cell cultures.  $**P<0.05$ .
